# Supplementary material for: Objective sputum colour assessment and clinical outcomes in bronchiectasis: data from the European Bronchiectasis Registry (EMBARC)
Source: PubMed Central journal article supplement — Eur Respir J. 2024 Apr 18;63(4):2301554. doi: 10.1183/13993003.01554-2023 (PMC11024393; doi:10.1183/13993003.01554-2023), 2024-04-18

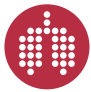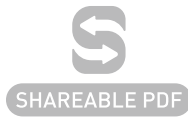

# Objective sputum colour assessment and clinical outcomes in bronchiectasis: data from the European Bronchiectasis Registry (EMBARC)

Stefano Aliberti <sup>1</sup>, Felix C. Ringshausen <sup>2</sup>, Raja Dhar, Charles S. Haworth, Michael R. Loebinger, Katerina Dimakou, Megan L. Crichton, Anthony De Soyza <sup>3</sup>, Montse Vendrell, Pierre-Regis Burgel <sup>4</sup>, Melissa McDonnell <sup>5</sup>, Sabina Skrgat, Luis Maiz Carro, Andres de Roux, Oriol Sibila, Apostolos Bossios <sup>6</sup>, Menno van der Eerden, Paula Kauppi, Robert Wilson, Branislava Milenkovic, Rosario Menendez, Marlene Murriss, Sermin Borekci, Oxana Munteanu, Dusanka Obradovic, Adam Nowinski, Adelina Amorim, Antoni Torres <sup>7</sup>, Natalie Lorent <sup>8</sup>, Eva Van Braeckel <sup>9</sup>, Josje Altenburg, Amelia Shoemark <sup>10</sup>, Michal Shteinberg <sup>11</sup>, Wim Boersma, Pieter C. Goeminne, J. Stuart Elborn, Adam T. Hill, Tobias Welte <sup>12</sup>, Francesco Blasi, Eva Polverino and James D. Chalmers on behalf of the EMBARC Registry Investigators

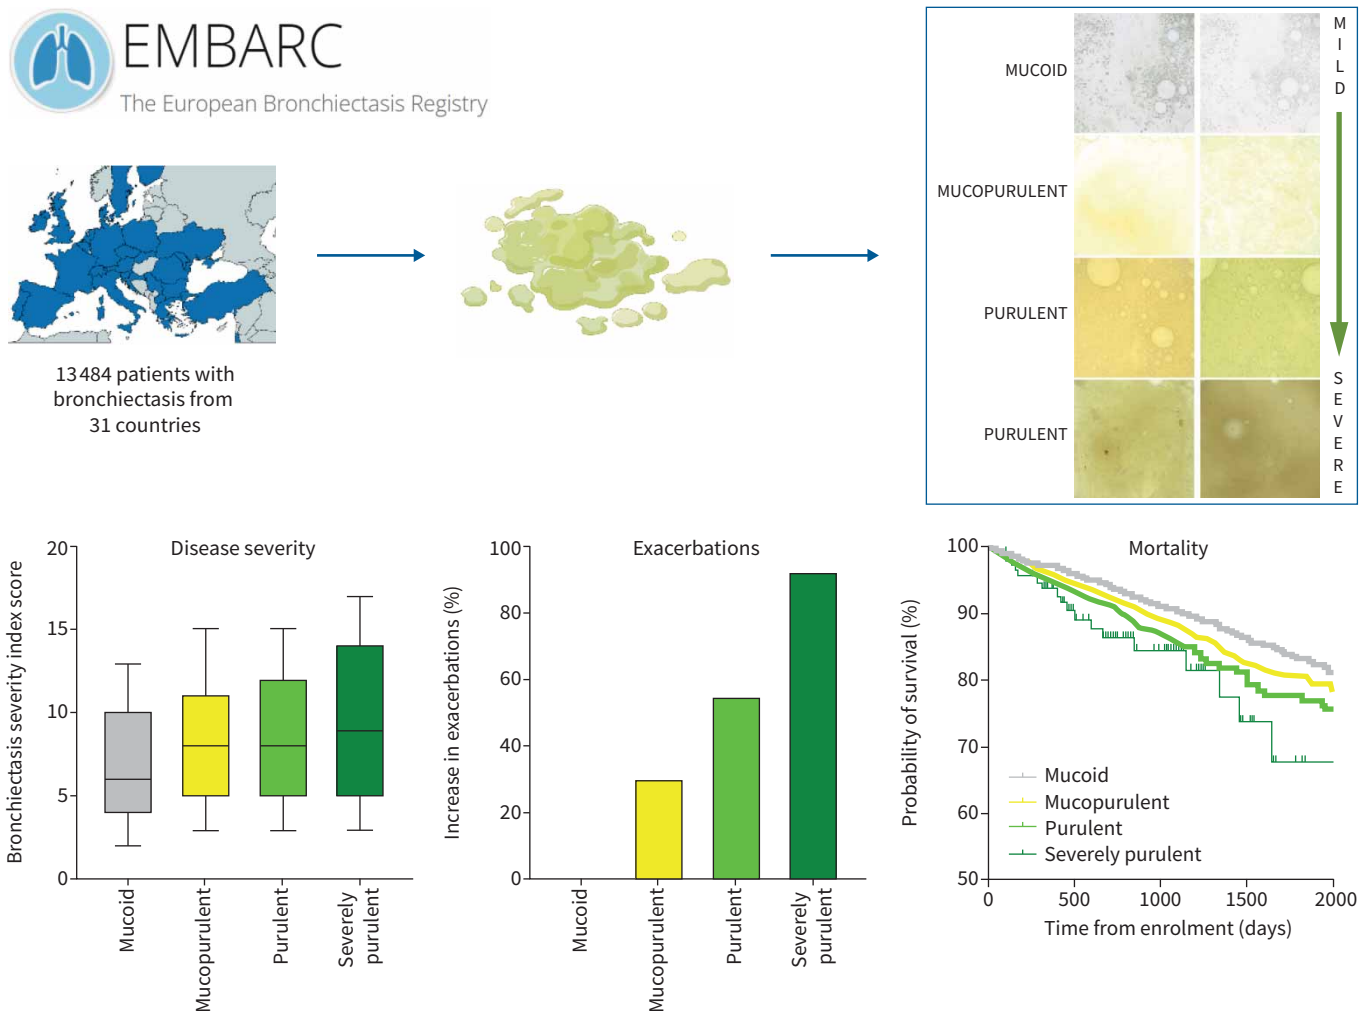

**GRAPHICAL ABSTRACT** We enrolled 13 484 patients with bronchiectasis from 31 countries. Assessment of sputum colour at baseline was used to investigate the relationship with disease severity and outcomes. We show a strong relationship between sputum colour and exacerbations and hospitalisation for severe exacerbations. Increasing sputum purulence is a marker of disease outcome in bronchiectasis.



# Objective sputum colour assessment and clinical outcomes in bronchiectasis: data from the European Bronchiectasis Registry (EMBARC)

Stefano Aliberti <sup>1,2</sup>, Felix C. Ringshausen <sup>3,4,5</sup>, Raja Dhar <sup>6</sup>, Charles S. Haworth <sup>7</sup>, Michael R. Loebinger <sup>8</sup>, Katerina Dimakou <sup>9</sup>, Megan L. Crichton <sup>10</sup>, Anthony De Soyza <sup>11</sup>, Montse Vendrell <sup>12</sup>, Pierre-Regis Burgel <sup>13,14</sup>, Melissa McDonnell <sup>15</sup>, Sabina Skrgat <sup>16,17,18</sup>, Luis Maiz Carro <sup>19</sup>, Andres de Roux <sup>20</sup>, Oriol Sibila <sup>21,22</sup>, Apostolos Bossios <sup>23,24</sup>, Menno van der Eerden <sup>25</sup>, Paula Kauppi <sup>26</sup>, Robert Wilson <sup>8</sup>, Branislava Milenkovic <sup>27,28</sup>, Rosario Menendez <sup>29</sup>, Marlene Murriss <sup>30</sup>, Sermin Borekci <sup>31</sup>, Oxana Munteanu <sup>32</sup>, Dusanka Obradovic <sup>33,34</sup>, Adam Nowinski <sup>35</sup>, Adelina Amorim <sup>36</sup>, Antoni Torres <sup>21,22</sup>, Natalie Lorent <sup>37</sup>, Eva Van Braeckel <sup>38,39</sup>, Josje Altenburg <sup>40</sup>, Amelia Shoemark <sup>10</sup>, Michal Shteinberg <sup>41,42</sup>, Wim Boersma <sup>43</sup>, Pieter C. Goeminne <sup>44</sup>, J. Stuart Elborn <sup>45</sup>, Adam T. Hill <sup>46</sup>, Tobias Welte <sup>3,4,5</sup>, Francesco Blasi <sup>47,48</sup>, Eva Polverino <sup>49</sup> and James D. Chalmers <sup>10</sup> on behalf of the EMBARC Registry Investigators

<sup>1</sup>Respiratory Unit, IRCCS Humanitas Research Hospital, Pieve Emanuele, Italy. <sup>2</sup>Department of Biomedical Sciences, Humanitas University, Pieve Emanuele, Italy. <sup>3</sup>Department of Respiratory Medicine and Infectious Diseases, Hannover Medical School, Hannover, Germany. <sup>4</sup>Biomedical Research in End-Stage and Obstructive Lung Disease Hannover, German Center for Lung Research (DZL), Hannover, Germany. <sup>5</sup>European Reference Network on Rare and Complex Respiratory Diseases, Frankfurt, Germany. <sup>6</sup>CK Birla Hospitals, Kolkata, India. <sup>7</sup>Cambridge Centre for Lung Infection, Royal Papworth Hospital and University of Cambridge, Cambridge, UK. <sup>8</sup>Royal Brompton and Harefield Hospitals and National Heart and Lung Institute, Imperial College London, London, UK. <sup>9</sup>5th Respiratory Department and Bronchiectasis Unit, "Sotiria" General Hospital of Chest Diseases Medical Practice, Athens, Greece. <sup>10</sup>Division of Molecular and Clinical Medicine, University of Dundee, Ninewells Hospital and Medical School, Dundee, UK. <sup>11</sup>Population and Health Science Institute, Newcastle University and NIHR Biomedical Research Centre for Ageing, Freeman Hospital, Newcastle, UK. <sup>12</sup>Department of Pulmonology, Dr Trueta University Hospital, Girona Biomedical Research Institute (IDIBGI), University of Girona, Girona, Spain. <sup>13</sup>Department of Respiratory Medicine and French Cystic Fibrosis National Reference Center, Hôpital Cochin, AP-HP, Paris, France. <sup>14</sup>Université Paris Cité, Inserm U1016, Institut Cochin, Paris, France. <sup>15</sup>Department of Respiratory Medicine, Galway University Hospital, Galway, Ireland. <sup>16</sup>University Clinic of Respiratory and Allergic Diseases Golnik, Golnik, Slovenia. <sup>17</sup>Medical Faculty, University of Ljubljana, Ljubljana, Slovenia. <sup>18</sup>Division of Internal Medicine, Pulmonary Department, University Medical Centre Ljubljana, Ljubljana, Slovenia. <sup>19</sup>Chronic Bronchial Infection Unit, Pneumology Service, Ramón y Cajal Hospital, Alcalá de Henares University, Madrid, Spain. <sup>20</sup>Pneumologische Praxis am Schloss Charlottenburg, Berlin, Germany. <sup>21</sup>Servicio de Neumología, Instituto Clínico de Respiratorio, IDIBAPS, Hospital Clínic, University of Barcelona, Barcelona, Spain. <sup>22</sup>CIBER de Enfermedades Respiratorias, Instituto de Salud Carlos III, Madrid, Spain. <sup>23</sup>Department of Respiratory Medicine and Allergy, Karolinska University Hospital, Stockholm, Sweden. <sup>24</sup>Division of Lung and Airway Research, Institute of Environmental Medicine, Karolinska Institutet, Stockholm, Sweden. <sup>25</sup>Erasmus MC, Department of Respiratory Medicine, Rotterdam, The Netherlands. <sup>26</sup>Heart and Lung Center, Helsinki, Finland. <sup>27</sup>Clinic for Pulmonary Diseases, University Clinical Center of Serbia, Belgrade, Serbia. <sup>28</sup>School of Medicine, University of Belgrade, Belgrade, Serbia. <sup>29</sup>Pneumology Department, Hospital Universitario y Politécnico La Fe – Instituto de Investigación Sanitaria La Fe, Valencia, Spain. <sup>30</sup>Department of Respiratory Diseases, CHU Toulouse, Toulouse, France. <sup>31</sup>Department of Pulmonology Diseases, Cerrahpasa Medical Faculty, Istanbul University – Cerrahpasa, Istanbul, Turkey. <sup>32</sup>Pneumology/Allergology Division, University of Medicine and Pharmacy Nicolae Testemitanu, Chisinau, Moldova. <sup>33</sup>Faculty of Medicine Novi Sad, University of Novi Sad, Novi Sad, Serbia. <sup>34</sup>Institute for Pulmonary Diseases, Sremska Kamenica, Serbia. <sup>35</sup>Department of Epidemiology, National Tuberculosis and Lung Diseases Research Institute, Warsaw, Poland. <sup>36</sup>Pulmonology Department, Centro Hospitalar Universitário S. João and Faculty of Medicine, University of Porto, Porto, Portugal. <sup>37</sup>Department of Respiratory Diseases, University Hospitals Leuven, Leuven, Belgium. <sup>38</sup>Department of Internal Medicine and Paediatrics, Faculty of Medicine and Health Sciences, Ghent University, Ghent, Belgium. <sup>39</sup>Department of Respiratory Medicine, Ghent University Hospital, Ghent, Belgium. <sup>40</sup>Department of Pulmonary Diseases, Amsterdam University Medical Centers, Amsterdam, The Netherlands. <sup>41</sup>Pulmonology Institute and CF Center, Carmel Medical Center, Haifa, Israel. <sup>42</sup>B. Rappaport Faculty of Medicine, Technion – Israel Institute of Technology, Haifa, Israel. <sup>43</sup>Department of Pulmonary Diseases, Northwest Clinics, Alkmaar, The Netherlands. <sup>44</sup>Department of Respiratory Disease, AZ Nikolaas, Sint-Niklaas, Belgium. <sup>45</sup>Faculty of Medicine, Health and Life Sciences, Queen's University, Belfast, UK. <sup>46</sup>Department of Respiratory Medicine, Royal Infirmary of Edinburgh, Edinburgh, UK. <sup>47</sup>Department of Pathophysiology and Transplantation, University of Milan, Milan, Italy. <sup>48</sup>Fondazione IRCCS Ca' Granda Ospedale Maggiore Policlinico, Milan, Italy. <sup>49</sup>Pneumology Department, Hospital Universitari Vall d'Hebron, Vall d'Hebron Institut de Recerca (VHIR), Vall d'Hebron Barcelona Hospital Campus, CIBERES, Barcelona, Spain.

Corresponding author: James D. Chalmers ([j.chalmers@dundee.ac.uk](mailto:j.chalmers@dundee.ac.uk))

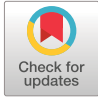

Shareable abstract (@ERSpublications)

**Sputum colour is a simple non-invasive marker of airway inflammation that identifies patients with bronchiectasis at higher risk of exacerbation, hospitalisation and mortality** <https://bit.ly/3HczGxO>

**Cite this article as:** Aliberti S, Ringshausen FC, Dhar R, *et al.* Objective sputum colour assessment and clinical outcomes in bronchiectasis: data from the European Bronchiectasis Registry (EMBARC). *Eur Respir J* 2024; 63: 2301554 [DOI: 10.1183/13993003.01554-2023].

This extracted version can be shared freely online.

Copyright ©The authors 2024.

This version is distributed under the terms of the Creative Commons Attribution Non-Commercial Licence 4.0. For commercial reproduction rights and permissions contact [permissions@ersnet.org](mailto:permissions@ersnet.org)

This article has an editorial commentary:  
<https://doi.org/10.1183/13993003.00152-2024>

Received: 13 Sept 2023  
Accepted: 2 Jan 2024

## Abstract

**Background** A validated 4-point sputum colour chart can be used to objectively evaluate the levels of airway inflammation in bronchiectasis patients. In the European Bronchiectasis Registry (EMBARC), we tested whether sputum colour would be associated with disease severity and clinical outcomes.

**Methods** We used a prospective, observational registry of adults with bronchiectasis conducted in 31 countries. Patients who did not produce spontaneous sputum were excluded from the analysis. The Murray sputum colour chart was used at baseline and at follow-up visits. Key outcomes were frequency of exacerbations, hospitalisations for severe exacerbations and mortality during up to 5-year follow-up.

**Results** 13 484 patients were included in the analysis. More purulent sputum was associated with lower forced expiratory volume in 1 s (FEV<sub>1</sub>), worse quality of life, greater bacterial infection and a higher bronchiectasis severity index. Sputum colour was strongly associated with the risk of future exacerbations during follow-up. Compared to patients with mucoid sputum (reference group), patients with mucopurulent sputum experienced significantly more exacerbations (incident rate ratio (IRR) 1.29, 95% CI 1.22–1.38;  $p < 0.0001$ ), while the rates were even higher for patients with purulent (IRR 1.55, 95% CI 1.44–1.67;  $p < 0.0001$ ) and severely purulent sputum (IRR 1.91, 95% CI 1.52–2.39;  $p < 0.0001$ ). Hospitalisations for severe exacerbations were also associated with increasing sputum colour with rate ratios, compared to patients with mucoid sputum, of 1.41 (95% CI 1.29–1.56;  $p < 0.0001$ ), 1.98 (95% CI 1.77–2.21;  $p < 0.0001$ ) and 3.05 (95% CI 2.25–4.14;  $p < 0.0001$ ) for mucopurulent, purulent and severely purulent sputum, respectively. Mortality was significantly increased with increasing sputum purulence, hazard ratio 1.12 (95% CI 1.01–1.24;  $p = 0.027$ ), for each increment in sputum purulence.

**Conclusion** Sputum colour is a simple marker of disease severity and future risk of exacerbations, severe exacerbations and mortality in patients with bronchiectasis.

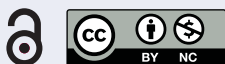

Supplement: ERJ-01554-2023.Shareable.pdf [file ERJ-01554-2023.Shareable.pdf]
