# Supplementary material for: Objective sputum colour assessment and clinical outcomes in bronchiectasis: data from the European Bronchiectasis Registry (EMBARC)
Source: PubMed Central journal article supplement — Eur Respir J. 2024 Apr 18;63(4):2301554. doi: 10.1183/13993003.01554-2023 (PMC11024393; doi:10.1183/13993003.01554-2023), 2024-04-18
Supplement: ERJ-01554-2023.Supplement.pdf [file ERJ-01554-2023.Supplement.pdf]

Supplementary data

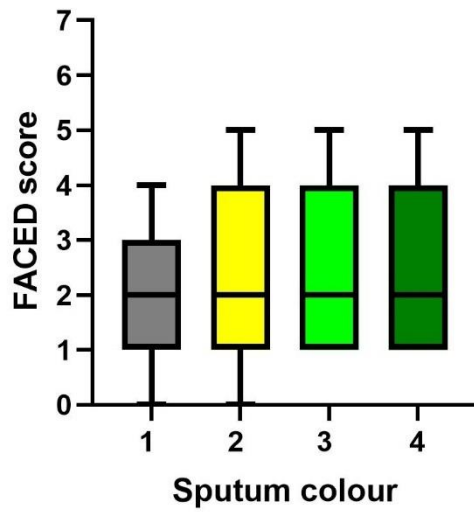

Supplementary Figure S1: The relationship between Faced score and Sputum colour ( $p < 0.0001$  by Kruskal Wallis test).

| <b>Aetiology</b>                | <b>Odds ratio (95%CI)</b> | <b>P-value</b> |
|---------------------------------|---------------------------|----------------|
| Idiopathic                      | 1.00 (reference)          | n/a            |
| Post-infective                  | 1.05 (0.94-1.18)          | 0.41           |
| Tuberculosis                    | 0.70 (0.59-0.85)          | <0.0001        |
| NTM infection                   | 0.96 (0.61-1.52)          | 0.87           |
| ABPA                            | 1.00 (0.78-1.28)          | 1.0            |
| Rheumatoid arthritis            | 1.08 (0.83-1.42)          | 0.56           |
| Primary ciliary dyskinesia      | 1.50 (1.20-1.87)          | <0.0001        |
| Asthma                          | 0.97 (0.80-1.17)          | 0.73           |
| COPD                            | 0.98 (0.93-1.16)          | 0.80           |
| GORD/aspiration                 | 0.99 (0.69-1.40)          | 0.93           |
| Immunodeficiency                | 1.25 (1.00-1.56)          | 0.050          |
| Alpha-1 anti-trypsin deficiency | 1.23 (0.70-2.15)          | 0.48           |
| Inflammatory bowel disease      | 0.99 (0.63-1.56)          | 0.98           |
| Connective tissue disease       | 1.35 (0.88-2.06)          | 0.17           |
| Obstructive                     | 1.18 (0.25-5.70)          | 0.84           |

**Table S1. Unadjusted odds ratios for different aetiologies and their relationship with purulent sputum (grades 3 or 4 on the sputum colour chart) compared to idiopathic bronchiectasis which is the reference group.**

|               | BSI             |                 |                 | FACED           |                 |                |
|---------------|-----------------|-----------------|-----------------|-----------------|-----------------|----------------|
|               | Mild            | Moderate        | Severe          | Mild            | Moderate        | Severe         |
| Mucoid        | 1546<br>(31.8%) | 1781<br>(36.7%) | 1531<br>(31.5%) | 3050<br>(62.8%) | 1477<br>(30.4%) | 331<br>(6.8%)  |
| Mucopurulent  | 1098<br>(22.6%) | 1766<br>(36.4%) | 1992<br>(41.0%) | 2752<br>(56.7%) | 1602<br>(33.0%) | 502<br>(10.3%) |
| Purulent      | 435<br>(18.5%)  | 831<br>(35.3%)  | 1091<br>(46.3%) | 1254<br>(53.2%) | 811<br>(34.4%)  | 292<br>(12.4%) |
| Very purulent | 29<br>(18.4%)   | 48<br>(30.4%)   | 81<br>(51.3%)   | 80<br>(50.6%)   | 47<br>(29.7%)   | 31<br>(19.6%)  |

**Table S2. Disease severity and its relationship with sputum purulence**

|                                        | <b>Mucoid</b> | <b>Mucopurulent</b> | <b>Purulent</b> | <b>Severe purulent</b> |
|----------------------------------------|---------------|---------------------|-----------------|------------------------|
| <b>N</b>                               | 4858          | 4856                | 2357            | 158                    |
| <i>P. aeruginosa</i>                   | 620 (12.8%)   | 1127 (23.2%)        | 709 (30.1%)     | 48 (30.4%)             |
| <i>H. influenzae</i>                   | 546 (11.2%)   | 765 (15.8%)         | 386 (16.4%)     | 23 (14.6%)             |
| <i>M. catarrhalis</i>                  | 127 (2.6%)    | 179 (3.7%)          | 74 (3.1%)       | 8 (5.1%)               |
| <i>Enterobacteriaceae</i>              | 268 (5.5%)    | 362 (7.5%)          | 255 (10.8%)     | 15 (9.5%)              |
| <i>Staphylococcus aureus</i>           | 180 (3.7%)    | 299 (6.2%)          | 174 (7.4%)      | 12 (7.6%)              |
| <i>Streptococcus pneumoniae</i>        | 217 (4.5%)    | 251 (5.2%)          | 139 (5.9%)      | 17 (10.8%)             |
| <i>Stenotrophomonas maltophilia</i>    | 45 (0.9%)     | 79 (1.6%)           | 49 (2.1%)       | 2 (1.3%)               |
| <i>Serratia marcescens</i>             | 36 (0.7%)     | 50 (1.0%)           | 31 (1.3%)       | 2 (1.3%)               |
| <i>Acromobacter xyloxidans</i>         | 18 (0.4%)     | 33 (0.7%)           | 16 (0.7%)       | 0 (0%)                 |
| <i>Haemophilus parainfluenzae</i>      | 52 (1.1%)     | 54 (1.1%)           | 37 (1.6%)       | 0 (0%)                 |
| <i>P. aeruginosa</i> chronic infection | 797 (16.4%)   | 1346 (27.7%)        | 804 (34.1%)     | 57 (36.1%)             |
| <b>Any positive culture</b>            | 1279 (26.3%)  | 1863 (38.4%)        | 1026 (43.5%)    | 84 (53.2%)             |

**Table S3. The frequency of different bacteria identified in sputum at baseline according to the sputum colour at baseline.**

| <b>Subgroup</b>                      | <b>Mucoid</b>   | <b>Mucopurulent</b> | <b>Purulent</b>  | <b>Severely purulent</b> |
|--------------------------------------|-----------------|---------------------|------------------|--------------------------|
| <b>Severity</b>                      |                 |                     |                  |                          |
| Mild                                 | 1.0 (reference) | 1.19 (1.04-1.36)    | 0.99 (0.81-1.21) | 1.95 (1.10-3.48)         |
| Moderate                             | 1.0 (reference) | 1.24 (1.12-1.37)    | 1.30 (1.14-1.48) | 2.10 (1.39-3.16)         |
| Severe                               | 1.0 (reference) | 1.19 (1.08-1.32)    | 1.48 (1.32-1.65) | 1.47 (1.08-2.01)         |
| <b>Microbiology</b>                  |                 |                     |                  |                          |
| Pseudomonas +ve                      | 1.0 (reference) | 1.05 (0.91-1.22)    | 1.39 (1.18-1.63) | 1.13 (0.74-1.73)         |
| Pseudomonas -ve                      | 1.0 (reference) | 1.31 (1.22-1.40)    | 1.43 (1.31-1.57) | 2.15 (1.65-2.82)         |
| <b>Past history of exacerbations</b> |                 |                     |                  |                          |
| <b>0</b>                             | 1.0 (reference) | 1.28 (1.11-1.49)    | 1.25 (1.03-1.51) | 1.83 (0.94-3.56)         |
| <b>1</b>                             | 1.0 (reference) | 1.22 (1.05-1.43)    | 1.07 (0.87-1.31) | 1.66 (0.90-3.08)         |
| <b>2</b>                             | 1.0 (reference) | 1.03 (0.89-1.20)    | 1.20 (0.99-1.47) | 2.01 (1.05-3.85)         |
| <b>3 or more</b>                     | 1.0 (reference) | 1.22 (1.11-1.33)    | 1.49 (1.34-1.66) | 1.54 (1.15-2.06)         |
| <b>Lung Function</b>                 |                 |                     |                  |                          |
| >80% predicted                       | 1.0 (reference) | 1.24 (1.11-1.37)    | 1.38 (1.20-1.58) | 2.45 (1.67-3.59)         |
| 50-80% predicted                     | 1.0 (reference) | 1.38 (1.24-1.54)    | 1.52 (1.34-1.74) | 1.68 (1.14-2.46)         |
| 30-49% predicted                     | 1.0 (reference) | 1.22 (1.05-1.41)    | 1.52 (1.27-1.81) | 1.19 (0.62-2.28)         |
| <30% predicted                       | 1.0 (reference) | 0.93 (0.71-1.21)    | 1.44 (1.06-1.94) | 2.75 (1.11-6.82)         |
| <b>Treatments</b>                    |                 |                     |                  |                          |
| Long term macrolide use              | 1.0 (reference) | 1.34 (1.16-1.55)    | 1.97 (1.68-2.33) | 1.85 (1.14-2.99)         |
| Long term inhaled antibiotic use     | 1.0 (reference) | 1.25 (1.00-1.57)    | 1.72 (1.35-2.18) | 1.27 (0.69-2.33)         |

**Table S4. The relationship between baseline clinical parameters and exacerbations during follow-up (data are presented as incidence rate ratios with 95% confidence intervals).**

| Sputum group      | Hazard ratio for time for first severe exacerbation (95%CI) |
|-------------------|-------------------------------------------------------------|
| Mucoid            | 1.0 (reference)                                             |
| Mucopurulent      | 1.18 (1.07-1.29)                                            |
| Purulent          | 1.54 (1.38-1.71)                                            |
| Severely purulent | 1.75 (1.29-2.37)                                            |

**Table S5. Time to first severe exacerbation is associated with sputum colour at baseline.**

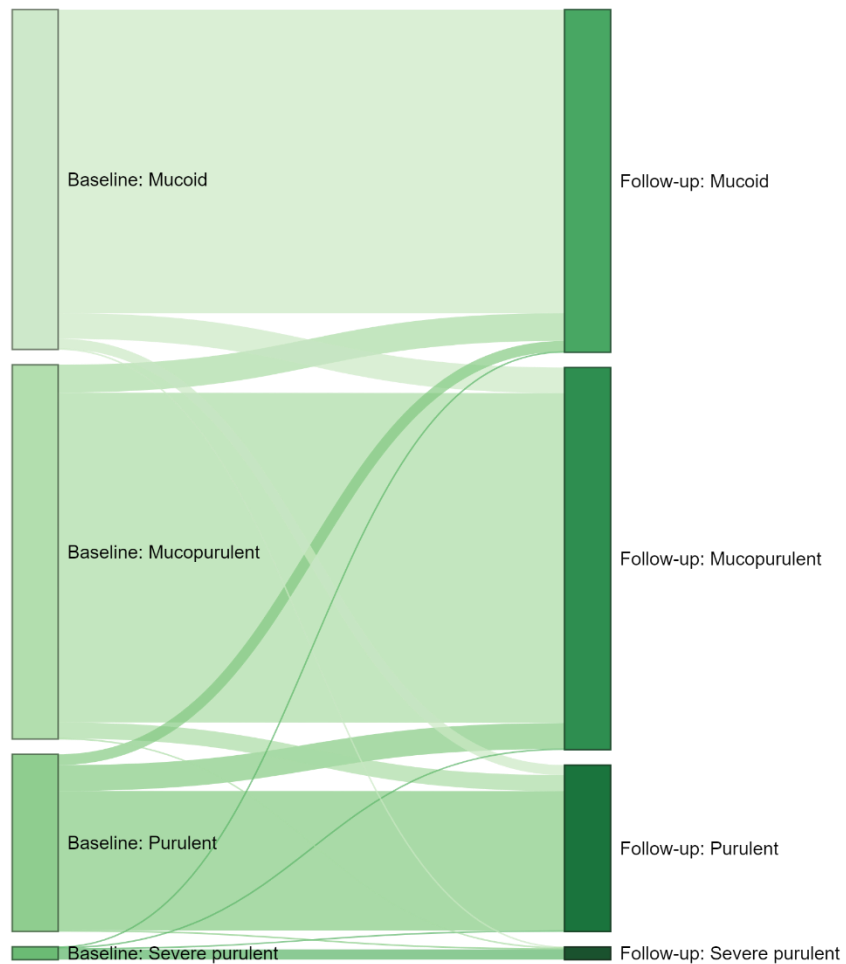

**Figure S2. Sankey diagram showing stability of sputum colour over time from baseline to visit 1.**
